# Supplementary material for: Relating Structure and Function in the Human Brain: Relative Contributions of Anatomy, Stationary Dynamics, and Non-stationarities
Source: PLOS journal article supplement (doi:10.1371/journal.pcbi.1003530), 2014-03-20
Supplement: S9 (10.1371/journal.pcbi.1003530.s009) [file journal.pcbi.1003530.s009]

301 Moved Permanently

# Moved Permanently

The document has moved here.

---

Apache Server at www.ploscompbiol.org Port 80
